# Supplementary material
Source: PubMed Central journal article supplement (PMC5746176)
Supplement: NIHMS927115-supplement-Suppl_Data.pdf [file NIHMS927115-supplement-Suppl_Data.pdf]

Supplemental Data (for publication only)

Supplemental Table 1. Cancer case counts, population estimates, and incidence rates by histology and year of diagnosis, Chinese males

| Year of Diagnosis | Population Estimates | All lung Cancer |                         | Small cell carcinoma |                         | NSCLC      |                         | Squamous cell carcinoma |                         | Adenocarcinoma |                         | Large cell carcinoma |                         | NSCLC NOS  |                         |
|-------------------|----------------------|-----------------|-------------------------|----------------------|-------------------------|------------|-------------------------|-------------------------|-------------------------|----------------|-------------------------|----------------------|-------------------------|------------|-------------------------|
|                   |                      | Case Count      | Incidence rate (95% CI) | Case Count           | Incidence rate (95% CI) | Case Count | Incidence rate (95% CI) | Case Count              | Incidence rate (95% CI) | Case Count     | Incidence rate (95% CI) | Case Count           | Incidence rate (95% CI) | Case Count | Incidence rate (95% CI) |
| 1990              | 346,928              | 132             | 56.4 (46.4-67.9)        | 9                    | 3.6 (1.6-6.9)           | 121        | 51.3 (41.7-62.2)        | 31                      | 13.9 (9.0-20.3)         | 56             | 22.6 (16.7-29.9)        | 12                   | 5.4 (2.5-9.9)           | 22         | 9.4 (5.6-14.5)          |
| 1991              | 362,532              | 155             | 61.0 (51.3-72.0)        | 14                   | 5.7 (3.0-9.7)           | 140        | 54.9 (45.7-65.3)        | 42                      | 16.5 (11.6-22.7)        | 53             | 18.9 (14.1-24.9)        | 15                   | 6.2 (3.4-10.3)          | 30         | 13.2 (8.6-19.2)         |
| 1992              | 378,145              | 187             | 67.7 (57.9-78.6)        | 16                   | 5.1 (2.8-8.3)           | 166        | 59.9 (50.7-70.2)        | 43                      | 15.5 (11.1-21.2)        | 67             | 23.6 (18.1-30.2)        | 18                   | 6.4 (3.7-10.3)          | 38         | 14.3 (9.8-19.9)         |
| 1993              | 393,756              | 177             | 59.9 (51.0-69.8)        | 21                   | 7.2 (4.4-11.1)          | 151        | 50.3 (42.3-59.3)        | 38                      | 13.2 (9.1-18.3)         | 56             | 17.1 (12.9-22.4)        | 12                   | 4.2 (2.1-7.4)           | 45         | 15.8 (11.3-21.3)        |
| 1994              | 409,370              | 157             | 52.3 (44.1-61.6)        | 19                   | 6.2 (3.6-9.7)           | 129        | 41.6 (34.4-49.7)        | 33                      | 10.6 (7.2-15.0)         | 53             | 16.3 (12.0-21.4)        | 17                   | 5.2 (3.0-8.4)           | 26         | 9.5 (6.0-14.1)          |
| 1995              | 424,978              | 174             | 55.1 (46.9-64.3)        | 20                   | 6.9 (4.1-10.8)          | 147        | 45.6 (38.2-53.9)        | 35                      | 10.8 (7.4-15.1)         | 71             | 20.1 (15.6-25.5)        | 10                   | 2.9 (1.4-5.4)           | 31         | 11.8 (7.8-16.8)         |
| 1996              | 440,591              | 159             | 45.7 (38.7-53.6)        | 15                   | 4.4 (2.4-7.3)           | 133        | 37.7 (31.4-44.9)        | 42                      | 12.1 (8.6-16.4)         | 48             | 13.5 (9.9-18.0)         | 11                   | 2.9 (1.5-5.3)           | 32         | 9.2 (6.2-13.1)          |
| 1997              | 456,202              | 176             | 48.1 (41.0-55.9)        | 17                   | 4.3 (2.5-6.9)           | 155        | 42.0 (35.5-49.4)        | 32                      | 9.2 (6.3-13.1)          | 65             | 16.2 (12.5-20.7)        | 6                    | 1.5 (0.6-3.4)           | 52         | 15.1 (11.1-19.8)        |
| 1998              | 471,817              | 193             | 51.4 (44.2-59.5)        | 21                   | 5.4 (3.3-8.3)           | 166        | 44.2 (37.5-51.7)        | 36                      | 10.1 (7.0-14.1)         | 69             | 17.7 (13.7-22.5)        | 11                   | 2.9 (1.4-5.3)           | 50         | 13.4 (9.8-17.8)         |
| 1999              | 487,423              | 210             | 55.1 (47.7-63.3)        | 19                   | 5.0 (3.0-7.7)           | 188        | 49.2 (42.2-57.0)        | 29                      | 7.6 (5.0-11.0)          | 81             | 21.7 (17.0-27.1)        | 15                   | 3.8 (2.1-6.3)           | 63         | 16.2 (12.3-20.7)        |
| 2000              | 503,040              | 235             | 56.9 (49.7-64.8)        | 19                   | 4.7 (2.8-7.5)           | 214        | 51.5 (44.7-59.1)        | 36                      | 8.2 (5.7-11.3)          | 86             | 19.8 (15.8-24.5)        | 14                   | 3.2 (1.7-5.4)           | 78         | 20.4 (16.0-25.5)        |
| 2001              | 516,489              | 208             | 48.8 (42.3-56.0)        | 17                   | 3.7 (2.2-6.0)           | 178        | 41.7 (35.7-48.5)        | 32                      | 7.5 (5.1-10.6)          | 78             | 17.7 (13.9-22.1)        | 6                    | 1.3 (0.5-2.9)           | 62         | 15.2 (11.6-19.6)        |
| 2002              | 529,938              | 229             | 50.3 (43.9-57.3)        | 26                   | 6.0 (3.9-8.8)           | 194        | 41.7 (36.0-48.1)        | 36                      | 7.7 (5.4-10.7)          | 83             | 17.7 (14.0-22.0)        | 9                    | 2.0 (0.9-3.7)           | 66         | 14.3 (11.0-18.3)        |
| 2003              | 543,387              | 261             | 53.0 (46.6-59.9)        | 17                   | 3.5 (2.1-5.7)           | 233        | 46.6 (40.8-53.1)        | 31                      | 6.2 (4.2-8.8)           | 95             | 18.6 (15.0-22.8)        | 11                   | 2.2 (1.1-4.0)           | 96         | 19.6 (15.8-23.9)        |
| 2004              | 556,836              | 245             | 47.5 (41.7-53.9)        | 23                   | 4.4 (2.8-6.7)           | 213        | 41.0 (35.6-46.9)        | 31                      | 6.1 (4.2-8.7)           | 106            | 19.8 (16.2-24.0)        | 10                   | 2.0 (1.0-3.7)           | 66         | 13.0 (10.1-16.6)        |
| 2005              | 570,285              | 265             | 50.3 (44.4-56.8)        | 22                   | 4.0 (2.5-6.0)           | 228        | 43.0 (37.6-49.0)        | 44                      | 8.5 (6.2-11.4)          | 91             | 16.9 (13.6-20.8)        | 12                   | 2.4 (1.2-4.2)           | 81         | 15.2 (12.1-19.0)        |
| 2006              | 583,734              | 278             | 50.1 (44.4-56.4)        | 27                   | 4.8 (3.2-7.0)           | 234        | 41.9 (36.7-47.7)        | 27                      | 5.1 (3.3-7.4)           | 118            | 20.6 (17.0-24.6)        | 9                    | 1.7 (0.8-3.2)           | 80         | 14.5 (11.5-18.1)        |
| 2007              | 597,183              | 294             | 50.7 (45.0-56.9)        | 25                   | 4.3 (2.8-6.4)           | 248        | 42.5 (37.4-48.2)        | 41                      | 7.1 (5.1-9.7)           | 126            | 21.1 (17.6-25.2)        | 6                    | 0.9 (0.3-2.1)           | 75         | 13.3 (10.5-16.7)        |
| 2008              | 610,632              | 250             | 41.2 (36.2-46.7)        | 17                   | 2.8 (1.6-4.5)           | 219        | 35.8 (31.2-40.9)        | 34                      | 5.6 (3.9-7.8)           | 114            | 18.4 (15.2-22.2)        | 8                    | 1.3 (0.6-2.6)           | 63         | 10.5 (8.0-13.5)         |
| 2009              | 624,081              | 297             | 47.0 (41.8-52.7)        | 24                   | 3.7 (2.4-5.5)           | 248        | 39.0 (34.3-44.2)        | 42                      | 6.6 (4.7-9.0)           | 127            | 19.6 (16.3-23.4)        | 6                    | 1.0 (0.4-2.1)           | 73         | 11.8 (9.3-14.9)         |
| 2010              | 637,529              | 276             | 41.7 (36.9-47.0)        | 27                   | 3.9 (2.6-5.7)           | 238        | 36.0 (31.5-40.9)        | 43                      | 6.6 (4.8-8.9)           | 143            | 21.6 (18.2-25.5)        | 6                    | 0.7 (0.3-1.7)           | 46         | 7.0 (5.1-9.4)           |

Rates are per 100,000 and age-adjusted to the 2000 US Std Population (18 age groups - Census P25-1130) standard; Confidence intervals (Tiwari mod) are 95% for rates.

--Statistic not displayed due to fewer than 5 cases.

Supplemental Table 2. Cancer case counts, population estimates, and incidence rates by histology and year of diagnosis, Chinese females

| Year of Diagnosis | Population Estimates | All lung Cancer |                         | Small cell carcinoma |                         | NSCLC      |                         | Squamous cell carcinoma |                         | Adenocarcinoma |                         | Large cell carcinoma |                         | NSCLC NOS  |                         |
|-------------------|----------------------|-----------------|-------------------------|----------------------|-------------------------|------------|-------------------------|-------------------------|-------------------------|----------------|-------------------------|----------------------|-------------------------|------------|-------------------------|
|                   |                      | Case Count      | Incidence rate (95% CI) | Case Count           | Incidence rate (95% CI) | Case Count | Incidence rate (95% CI) | Case Count              | Incidence rate (95% CI) | Case Count     | Incidence rate (95% CI) | Case Count           | Incidence rate (95% CI) | Case Count | Incidence rate (95% CI) |
| 1990              | 357,922              | 89              | 32.7 (26.1-40.5)        | 8                    | 3.1 (1.3-6.0)           | 79         | 28.7 (22.5-35.9)        | 10                      | 3.4 (1.6-6.2)           | 40             | 14.1 (9.9-19.3)         | 15                   | 5.6 (3.1-9.3)           | 14         | 5.6 (3.0-9.4)           |
| 1991              | 376,552              | 89              | 29.9 (23.9-36.9)        | 5                    | 1.9 (0.6-4.3)           | 80         | 26.5 (20.9-33.1)        | 10                      | 3.6 (1.7-6.6)           | 55             | 17.9 (13.4-23.4)        | --                   | --                      | 11         | 3.8 (1.9-6.7)           |
| 1992              | 395,188              | 117             | 36.5 (30.0-43.8)        | 8                    | 2.5 (1.1-4.9)           | 104        | 31.8 (25.8-38.6)        | 11                      | 3.3 (1.6-5.9)           | 63             | 19.4 (14.8-24.9)        | 9                    | 2.7 (1.2-5.1)           | 21         | 6.4 (4.0-9.9)           |
| 1993              | 413,827              | 91              | 26.7 (21.4-32.8)        | --                   | --                      | 86         | 25.1 (20.0-31.0)        | 8                       | 2.4 (1.0-4.8)           | 51             | 14.5 (10.7-19.1)        | 12                   | 3.5 (1.8-6.1)           | 15         | 4.7 (2.6-7.7)           |
| 1994              | 432,466              | 110             | 30.3 (24.8-36.5)        | 5                    | 1.5 (0.5-3.4)           | 99         | 26.8 (21.7-32.7)        | 12                      | 3.3 (1.7-5.8)           | 66             | 17.5 (13.5-22.3)        | 7                    | 1.9 (0.7-3.9)           | 14         | 4.2 (2.3-7.0)           |
| 1995              | 451,104              | 124             | 32.5 (27.0-38.8)        | 8                    | 2.2 (0.9-4.2)           | 111        | 29.0 (23.8-35.0)        | 11                      | 3.1 (1.5-5.4)           | 78             | 20.0 (15.8-25.0)        | --                   | --                      | 18         | 4.9 (2.9-7.8)           |
| 1996              | 469,739              | 120             | 29.5 (24.4-35.4)        | 7                    | 1.7 (0.7-3.4)           | 107        | 26.1 (21.4-31.6)        | 7                       | 1.9 (0.8-3.8)           | 67             | 15.9 (12.3-20.2)        | 9                    | 2.2 (1.0-4.2)           | 24         | 6.2 (3.9-9.2)           |
| 1997              | 488,378              | 135             | 31.5 (26.4-37.4)        | --                   | --                      | 125        | 28.8 (23.9-34.4)        | 9                       | 2.1 (1.0-4.0)           | 75             | 17.3 (13.6-21.7)        | 7                    | 1.4 (0.6-3.0)           | 34         | 8.0 (5.5-11.2)          |
| 1998              | 507,017              | 140             | 31.1 (26.1-36.7)        | 7                    | 1.5 (0.6-3.1)           | 123        | 27.0 (22.4-32.3)        | 12                      | 2.8 (1.5-4.9)           | 71             | 15.4 (12.0-19.4)        | 8                    | 1.5 (0.7-3.1)           | 32         | 7.3 (5.0-10.3)          |
| 1999              | 525,654              | 114             | 23.9 (19.7-28.8)        | 8                    | 1.9 (0.8-3.6)           | 101        | 21.0 (17.1-25.5)        | 9                       | 2.0 (0.9-3.7)           | 60             | 12.2 (9.3-15.8)         | 8                    | 1.6 (0.7-3.2)           | 24         | 5.2 (3.3-7.7)           |
| 2000              | 544,294              | 139             | 27.9 (23.4-32.9)        | --                   | --                      | 131        | 26.1 (21.8-31.0)        | 7                       | 1.4 (0.5-2.8)           | 86             | 17.2 (13.7-21.2)        | --                   | --                      | 34         | 6.8 (4.7-9.5)           |
| 2001              | 561,345              | 164             | 30.8 (26.2-35.9)        | 6                    | 1.1 (0.4-2.5)           | 152        | 28.4 (24.0-33.3)        | 7                       | 1.3 (0.5-2.7)           | 94             | 17.4 (14.0-21.3)        | 6                    | 1.1 (0.4-2.4)           | 45         | 8.5 (6.2-11.4)          |
| 2002              | 578,396              | 172             | 30.4 (26.0-35.3)        | 6                    | 1.0 (0.4-2.3)           | 158        | 27.8 (23.6-32.5)        | 6                       | 1.1 (0.4-2.4)           | 88             | 15.3 (12.3-18.9)        | 8                    | 1.4 (0.6-2.7)           | 56         | 10.0 (7.6-13.0)         |
| 2003              | 595,447              | 183             | 30.6 (26.3-35.4)        | --                   | --                      | 170        | 28.4 (24.3-33.0)        | 9                       | 1.5 (0.7-2.9)           | 115            | 19.1 (15.7-22.9)        | 8                    | 1.4 (0.6-2.7)           | 38         | 6.5 (4.6-8.9)           |
| 2004              | 612,498              | 177             | 27.8 (23.9-32.3)        | --                   | --                      | 165        | 25.9 (22.1-30.2)        | 11                      | 1.7 (0.9-3.1)           | 104            | 16.2 (13.2-19.7)        | 7                    | 1.1 (0.5-2.4)           | 43         | 6.8 (4.9-9.2)           |
| 2005              | 629,549              | 191             | 28.9 (25.0-33.4)        | 8                    | 1.2 (0.5-2.4)           | 173        | 26.2 (22.4-30.4)        | 13                      | 1.9 (1.0-3.3)           | 110            | 16.5 (13.6-19.9)        | 9                    | 1.5 (0.7-2.8)           | 41         | 6.2 (4.5-8.5)           |
| 2006              | 646,600              | 214             | 31.2 (27.1-35.7)        | --                   | --                      | 200        | 29.1 (25.2-33.4)        | 7                       | 1.0 (0.4-2.0)           | 130            | 18.7 (15.6-22.3)        | 7                    | 1.1 (0.4-2.3)           | 56         | 8.3 (6.3-10.8)          |
| 2007              | 663,651              | 185             | 25.4 (21.9-29.4)        | 8                    | 1.1 (0.5-2.2)           | 163        | 22.4 (19.1-26.2)        | 9                       | 1.2 (0.6-2.3)           | 96             | 13.3 (10.7-16.3)        | 6                    | 0.8 (0.3-1.8)           | 52         | 7.1 (5.3-9.4)           |
| 2008              | 680,702              | 179             | 23.8 (20.4-27.6)        | 9                    | 1.3 (0.6-2.4)           | 162        | 21.4 (18.2-25.0)        | 8                       | 1.1 (0.5-2.2)           | 119            | 15.7 (12.9-18.8)        | --                   | --                      | 31         | 4.1 (2.8-5.9)           |
| 2009              | 697,753              | 220             | 27.5 (24.0-31.5)        | --                   | --                      | 197        | 24.6 (21.3-28.4)        | 12                      | 1.6 (0.8-2.8)           | 139            | 17.3 (14.5-20.4)        | 5                    | 0.7 (0.2-1.6)           | 41         | 5.1 (3.7-7.0)           |
| 2010              | 714,800              | 219             | 26.7 (23.3-30.6)        | 7                    | 0.9 (0.4-2.0)           | 201        | 24.5 (21.2-28.2)        | 14                      | 1.7 (0.9-2.9)           | 148            | 18.0 (15.2-21.2)        | --                   | --                      | 36         | 4.4 (3.0-6.1)           |

Rates are per 100,000 and age-adjusted to the 2000 US Std Population (18 age groups - Census P25-1130) standard; Confidence intervals (Tiwari mod) are 95% for rates.

--Statistic not displayed due to fewer than 5 cases.

Supplemental Table 3. Cancer case counts, population estimates, and incidence rates by histology and year of diagnosis, foreign-born Chinese males

| Year of Diagnosis | Population Estimates | All lung Cancer |                         | Small cell carcinoma |                         | NSCLC      |                         | Squamous cell carcinoma |                         | Adenocarcinoma |                         | Large cell carcinoma |                         | NSCLC NOS  |                         |
|-------------------|----------------------|-----------------|-------------------------|----------------------|-------------------------|------------|-------------------------|-------------------------|-------------------------|----------------|-------------------------|----------------------|-------------------------|------------|-------------------------|
|                   |                      | Case Count      | Incidence rate (95% CI) | Case Count           | Incidence rate (95% CI) | Case Count | Incidence rate (95% CI) | Case Count              | Incidence rate (95% CI) | Case Count     | Incidence rate (95% CI) | Case Count           | Incidence rate (95% CI) | Case Count | Incidence rate (95% CI) |
| 1990              | 237,869              | 120             | 59.6 (48.6-73.2)        | 8                    | 3.7 (1.6-9.4)           | 110        | 54.2 (43.7-67.2)        | 28                      | 15.0 (9.5-23.4)         | 50             | 23.0 (16.7-31.9)        | 11                   | 5.9 (2.6-12.7)          | 21         | 10.4 (6.2-17.6)         |
| 1991              | 249,430              | 145             | 66.2 (55.2-79.3)        | 14                   | 6.6 (3.4-12.8)          | 130        | 59.1 (48.8-71.6)        | 42                      | 19.0 (13.4-27.2)        | 48             | 19.9 (14.5-27.7)        | 16                   | 7.6 (4.2-13.9)          | 24         | 12.6 (7.7-20.3)         |
| 1992              | 261,508              | 174             | 73.7 (62.6-87.0)        | 14                   | 5.3 (2.8-10.7)          | 155        | 65.2 (54.8-77.7)        | 41                      | 17.1 (12.0-24.6)        | 63             | 25.8 (19.6-34.2)        | 17                   | 7.2 (4.0-13.2)          | 34         | 15.1 (10.1-22.7)        |
| 1993              | 271,779              | 159             | 63.2 (53.1-75.2)        | 20                   | 8.0 (4.7-13.9)          | 134        | 52.1 (43.2-63.1)        | 35                      | 14.3 (9.7-21.5)         | 48             | 16.9 (12.4-23.7)        | 11                   | 4.5 (2.1-9.9)           | 40         | 16.4 (11.4-23.8)        |
| 1994              | 279,887              | 138             | 54.6 (45.3-66.0)        | 14                   | 5.3 (2.8-10.7)          | 115        | 43.6 (35.5-53.7)        | 31                      | 11.4 (7.5-17.7)         | 42             | 15.7 (11.2-22.7)        | 17                   | 5.7 (3.3-10.9)          | 25         | 10.8 (6.7-17.5)         |
| 1995              | 288,079              | 157             | 57.5 (48.5-68.5)        | 19                   | 7.0 (4.1-12.5)          | 130        | 46.8 (38.8-56.8)        | 32                      | 11.5 (7.7-17.6)         | 62             | 20.2 (15.4-27.1)        | 7                    | 2.6 (1.0-7.4)           | 29         | 12.5 (8.1-19.3)         |
| 1996              | 296,143              | 141             | 46.3 (38.8-55.8)        | 13                   | 4.4 (2.3-9.4)           | 116        | 37.6 (30.8-46.3)        | 39                      | 12.9 (9.0-19.1)         | 40             | 12.6 (9.0-18.6)         | 9                    | 2.6 (1.2-7.2)           | 28         | 9.4 (6.1-15.1)          |
| 1997              | 306,316              | 163             | 50.1 (42.5-59.5)        | 15                   | 4.3 (2.4-8.9)           | 144        | 43.8 (36.7-52.7)        | 33                      | 10.4 (7.1-16.0)         | 60             | 16.9 (12.8-23.0)        | 5                    | 1.4 (0.5-5.9)           | 46         | 15.1 (10.9-21.5)        |
| 1998              | 316,488              | 178             | 53.4 (45.6-63.1)        | 20                   | 5.9 (3.6-10.7)          | 153        | 45.8 (38.6-54.8)        | 33                      | 10.7 (7.2-16.4)         | 64             | 18.3 (14.0-24.7)        | 9                    | 2.8 (1.2-7.4)           | 47         | 14.0 (10.2-20.0)        |
| 1999              | 327,459              | 176             | 51.8 (44.2-61.1)        | 16                   | 4.7 (2.7-9.5)           | 157        | 46.0 (38.9-54.9)        | 25                      | 7.4 (4.7-12.6)          | 66             | 20.0 (15.3-26.7)        | 16                   | 4.4 (2.5-9.1)           | 50         | 14.2 (10.4-20.0)        |
| 2000              | 339,388              | 198             | 52.5 (45.3-61.3)        | 14                   | 3.4 (1.9-7.8)           | 182        | 48.4 (41.5-57.0)        | 35                      | 9.0 (6.2-14.0)          | 67             | 17.3 (13.3-23.2)        | 13                   | 3.4 (1.8-7.8)           | 67         | 18.8 (14.5-25.1)        |
| 2001              | 345,876              | 195             | 51.1 (44.1-59.9)        | 19                   | 4.7 (2.8-9.2)           | 166        | 43.6 (37.1-51.9)        | 33                      | 8.6 (5.9-13.6)          | 66             | 16.9 (13.0-22.8)        | 6                    | 1.5 (0.5-5.7)           | 61         | 16.6 (12.6-22.6)        |
| 2002              | 350,687              | 211             | 51.9 (45.0-60.5)        | 23                   | 5.7 (3.6-10.4)          | 180        | 43.7 (37.5-51.7)        | 31                      | 7.4 (5.0-12.3)          | 82             | 19.8 (15.7-25.9)        | 8                    | 2.1 (0.9-6.5)           | 59         | 14.4 (10.9-20.1)        |
| 2003              | 354,392              | 237             | 54.8 (48.0-63.4)        | 18                   | 4.1 (2.4-8.6)           | 210        | 48.1 (41.8-56.2)        | 29                      | 6.6 (4.4-11.3)          | 85             | 19.2 (15.3-25.1)        | 10                   | 2.3 (1.1-6.6)           | 86         | 20.1 (16.0-26.2)        |
| 2004              | 356,851              | 230             | 50.5 (44.1-58.6)        | 23                   | 5.0 (3.1-9.6)           | 197        | 42.9 (37.1-50.5)        | 33                      | 7.5 (5.1-12.4)          | 96             | 20.2 (16.3-26.1)        | 9                    | 2.1 (0.9-6.5)           | 59         | 13.2 (10.0-18.6)        |

Rates are per 100,000 and age-adjusted to the 2000 US Std Population (18 age groups - Census P25-1130) standard; Confidence intervals (Tiwari mod) are 95% for rates.

--Statistic not displayed due to fewer than 5 cases.

Supplemental Table 4. Cancer case counts, population estimates, and incidence rates by histology and year of diagnosis, US-born Chinese males

| Year of Diagnosis | Population Estimates | All lung Cancer |                         | Small cell carcinoma |                         | NSCLC      |                         | Squamous cell carcinoma |                         | Adenocarcinoma |                         | Large cell carcinoma |                         | NSCLC NOS  |                         |
|-------------------|----------------------|-----------------|-------------------------|----------------------|-------------------------|------------|-------------------------|-------------------------|-------------------------|----------------|-------------------------|----------------------|-------------------------|------------|-------------------------|
|                   |                      | Case Count      | Incidence rate (95% CI) | Case Count           | Incidence rate (95% CI) | Case Count | Incidence rate (95% CI) | Case Count              | Incidence rate (95% CI) | Case Count     | Incidence rate (95% CI) | Case Count           | Incidence rate (95% CI) | Case Count | Incidence rate (95% CI) |
| 1990-1992         | 347,433              | 41              | 41.8 (28.6-58.4)        | --                   | --                      | 37         | 38.0 (25.3-54.2)        | 6                       | 5.6 (1.8-12.7)          | 18             | 18.4 (9.6-31.1)         | --                   | --                      | 11         | 12.6 (6.0-22.6)         |
| 1993-1995         | 405,173              | 65              | 51.7 (38.4-67.6)        | 9                    | 10.0 (3.8-19.9)         | 56         | 43.4 (31.5-57.8)        | 8                       | 5.6 (2.2-11.3)          | 30             | 21.4 (14.1-30.9)        | --                   | --                      | 14         | 13.8 (6.5-24.5)         |
| 1996-1998         | 450,333              | 60              | 46.9 (35.0-61.1)        | 5                    | 3.3 (1.0-7.6)           | 53         | 42.7 (31.2-56.5)        | 12                      | 9.1 (4.4-16.3)          | 22             | 18.2 (10.9-27.8)        | --                   | --                      | 15         | 12.2 (6.5-20.3)         |
| 1999-2001         | 498,475              | 107             | 75.7 (61.4-92.1)        | 8                    | 7.1 (2.9-13.7)          | 99         | 68.6 (55.2-84.0)        | 11                      | 7.1 (3.5-12.4)          | 54             | 35.0 (26.0-45.8)        | --                   | --                      | 32         | 25.5 (17.0-36.2)        |
| 2002-2004         | 577,303              | 87              | 50.0 (39.8-61.7)        | --                   | --                      | 80         | 45.1 (35.5-56.2)        | 9                       | 4.8 (2.1-8.9)           | 38             | 21.0 (14.7-28.8)        | --                   | --                      | 29         | 16.9 (11.2-24.1)        |

Rates are per 100,000 and age-adjusted to the 2000 US Std Population (18 age groups - Census P25-1130) standard; Confidence intervals (Tiwari mod) are 95% for rates.

--Statistic not displayed due to fewer than 5 cases.

Supplemental Table 5. Cancer case counts, population estimates, and incidence rates by histology and year of diagnosis, foreign-born Chinese females

| Year of Diagnosis | Population Estimates | All lung Cancer |                         | Small cell carcinoma |                         | NSCLC      |                         | Squamous cell carcinoma |                         | Adenocarcinoma |                         | Large cell carcinoma |                         | NSCLC NOS  |                         |
|-------------------|----------------------|-----------------|-------------------------|----------------------|-------------------------|------------|-------------------------|-------------------------|-------------------------|----------------|-------------------------|----------------------|-------------------------|------------|-------------------------|
|                   |                      | Case Count      | Incidence rate (95% CI) | Case Count           | Incidence rate (95% CI) | Case Count | Incidence rate (95% CI) | Case Count              | Incidence rate (95% CI) | Case Count     | Incidence rate (95% CI) | Case Count           | Incidence rate (95% CI) | Case Count | Incidence rate (95% CI) |
| 1990              | 255,888              | 80              | 33.6 (26.4-43.3)        | 5                    | 2.3 (0.7-8.4)           | 73         | 30.1 (23.4-39.4)        | 9                       | 3.4 (1.5-9.4)           | 37             | 14.9 (10.4-22.5)        | 14                   | 6.0 (3.2-12.4)          | 13         | 5.8 (3.0-12.2)          |
| 1991              | 269,107              | 72              | 28.2 (21.9-36.9)        | --                   | --                      | 64         | 24.6 (18.8-32.8)        | 8                       | 3.4 (1.4-9.0)           | 42             | 15.8 (11.3-23.0)        | --                   | --                      | 11         | 4.4 (2.1-10.0)          |
| 1992              | 283,791              | 108             | 39.5 (32.2-48.9)        | 7                    | 2.5 (1.0-7.6)           | 97         | 34.9 (28.1-43.8)        | 10                      | 3.4 (1.6-8.6)           | 59             | 21.6 (16.3-29.1)        | 11                   | 3.8 (1.9-9.0)           | 17         | 6.1 (3.5-11.7)          |
| 1993              | 297,704              | 77              | 26.9 (21.1-34.8)        | --                   | --                      | 72         | 25.0 (19.5-32.7)        | 8                       | 2.8 (1.2-7.6)           | 43             | 14.5 (10.4-20.9)        | 8                    | 2.8 (1.2-7.7)           | 13         | 4.9 (2.6-10.1)          |
| 1994              | 309,588              | 91              | 29.7 (23.8-37.5)        | --                   | --                      | 82         | 26.2 (20.8-33.7)        | 11                      | 3.7 (1.8-8.4)           | 56             | 17.4 (13.1-23.8)        | 5                    | 1.6 (0.5-6.0)           | 10         | 3.5 (1.7-8.3)           |
| 1995              | 321,492              | 101             | 31.6 (25.7-39.3)        | 6                    | 1.9 (0.7-6.1)           | 90         | 28.2 (22.6-35.5)        | 10                      | 3.3 (1.6-7.7)           | 64             | 19.5 (15.0-25.9)        | --                   | --                      | 13         | 4.4 (2.3-9.0)           |
| 1996              | 333,166              | 113             | 32.6 (26.8-40.1)        | 6                    | 1.7 (0.6-5.6)           | 101        | 28.9 (23.5-36.0)        | 7                       | 2.2 (0.9-6.2)           | 61             | 16.7 (12.7-22.5)        | 8                    | 2.4 (1.0-6.4)           | 25         | 7.6 (4.9-12.4)          |
| 1997              | 347,525              | 127             | 34.8 (28.9-42.2)        | --                   | --                      | 115        | 31.0 (25.5-38.0)        | 8                       | 2.2 (0.9-5.9)           | 66             | 17.9 (13.8-23.7)        | 7                    | 1.6 (0.6-5.2)           | 34         | 9.3 (6.4-14.1)          |
| 1998              | 361,232              | 127             | 32.1 (26.7-39.0)        | 6                    | 1.5 (0.5-4.9)           | 112        | 28.0 (23.0-34.5)        | 11                      | 3.0 (1.5-6.7)           | 66             | 16.2 (12.5-21.5)        | 8                    | 1.8 (0.8-5.2)           | 27         | 7.0 (4.6-11.3)          |
| 1999              | 374,159              | 102             | 24.6 (20.0-30.6)        | 8                    | 2.1 (0.9-5.6)           | 90         | 21.4 (17.2-27.1)        | 5                       | 1.3 (0.4-4.5)           | 52             | 12.1 (9.0-16.8)         | 7                    | 1.6 (0.6-4.8)           | 26         | 6.4 (4.2-10.5)          |
| 2000              | 388,009              | 131             | 29.4 (24.5-35.5)        | --                   | --                      | 125        | 27.9 (23.2-33.9)        | 7                       | 1.5 (0.6-4.5)           | 81             | 18.1 (14.3-23.2)        | --                   | --                      | 34         | 7.7 (5.3-11.6)          |
| 2001              | 396,185              | 146             | 31.0 (26.2-37.1)        | 5                    | 1.1 (0.4-4.1)           | 136        | 28.7 (24.0-34.6)        | 8                       | 1.7 (0.7-4.7)           | 86             | 18.0 (14.4-23.0)        | 5                    | 1.0 (0.3-3.9)           | 37         | 7.9 (5.6-11.8)          |
| 2002              | 403,279              | 158             | 31.7 (26.9-37.7)        | 5                    | 1.0 (0.3-4.0)           | 143        | 28.6 (24.1-34.4)        | 6                       | 1.2 (0.5-4.3)           | 76             | 15.0 (11.8-19.6)        | 9                    | 1.8 (0.8-4.9)           | 52         | 10.6 (7.9-14.8)         |
| 2003              | 408,853              | 173             | 32.9 (28.2-39.0)        | --                   | --                      | 163        | 31.0 (26.4-36.8)        | 6                       | 1.1 (0.4-4.2)           | 110            | 20.8 (17.1-25.8)        | 8                    | 1.6 (0.7-4.6)           | 39         | 7.5 (5.3-11.3)          |
| 2004              | 413,064              | 168             | 30.2 (25.8-35.9)        | --                   | --                      | 154        | 27.6 (23.4-33.1)        | 7                       | 1.3 (0.5-4.4)           | 102            | 18.1 (14.7-22.9)        | 6                    | 1.2 (0.4-4.3)           | 39         | 7.0 (5.0-10.8)          |

Rates are per 100,000 and age-adjusted to the 2000 US Std Population (18 age groups - Census P25-1130) standard; Confidence intervals (Tiwari mod) are 95% for rates.

--Statistic not displayed due to fewer than 5 cases.

Supplemental Table 6. Cancer case counts, population estimates, and incidence rates by histology and year of diagnosis, US-born Chinese females

| Year of Diagnosis | Population Estimates | All lung Cancer |                         | Small cell carcinoma |                         | NSCLC      |                         | Squamous cell carcinoma |                         | Adenocarcinoma |                         | Large cell carcinoma |                         | NSCLC NOS  |                         |
|-------------------|----------------------|-----------------|-------------------------|----------------------|-------------------------|------------|-------------------------|-------------------------|-------------------------|----------------|-------------------------|----------------------|-------------------------|------------|-------------------------|
|                   |                      | Case Count      | Incidence rate (95% CI) | Case Count           | Incidence rate (95% CI) | Case Count | Incidence rate (95% CI) | Case Count              | Incidence rate (95% CI) | Case Count     | Incidence rate (95% CI) | Case Count           | Incidence rate (95% CI) | Case Count | Incidence rate (95% CI) |
| 1990-1992         | 325,702              | 42              | 37.8 (26.3-52.2)        | 6                    | 5.1 (1.8-11.1)          | 35         | 31.1 (20.7-44.4)        | --                      | --                      | 23             | 19.4 (11.6-30.0)        | --                   | --                      | 5          | 5.8 (1.5-13.8)          |
| 1993-1995         | 384,147              | 60              | 41.6 (31.3-54.0)        | --                   | --                      | 55         | 37.5 (27.8-49.3)        | --                      | --                      | 35             | 23.0 (15.7-32.3)        | 7                    | 4.8 (1.8-9.9)           | 11         | 8.4 (4.0-15.0)          |
| 1996-1998         |                      |                 | 24.4 (17.2-33.2)        | --                   | --                      |            | 37                      | 22.5 (15.6-31.0)        | --                      |                | --                      |                      |                         |            | 23                      |
| 1999-2001         | 474,487              | 62              | 31.5 (24.1-40.3)        | --                   | --                      | 57         | 28.8 (21.7-37.3)        | 7                       | 3.4 (1.4-6.9)           | 31             | 15.5 (10.5-21.9)        | --                   | --                      | 15         | 7.7 (4.3-12.6)          |
| 2002-2004         | 549,017              | 62              | 27.6 (21.0-35.5)        | --                   | --                      | 59         | 26.0 (19.6-33.5)        | 8                       | 3.7 (1.6-7.1)           | 32             | 14.0 (9.5-19.8)         | --                   | --                      | 18         | 7.8 (4.5-12.3)          |

Rates are per 100,000 and age-adjusted to the 2000 US Std Population (18 age groups - Census P25-1130) standard; Confidence intervals (Tiwari mod) are 95% for rates.

--Statistic not displayed due to fewer than 5 cases.
